# Supplementary material for: Oxidative stress increases M1dG, a major peroxidation-derived DNA adduct, in mitochondrial DNA
Source: PubMed Central journal article supplement — Nucleic Acids Res. 2018 Feb 9;46(7):3458–67. doi: 10.1093/nar/gky089 (PMC5909422; doi:10.1093/nar/gky089), 2018-02-09
Supplement: gky089_supp.pdf [file gky089_supp.pdf]

## Supporting Information

### **Oxidative stress increases M<sub>1</sub>dG, a major peroxidation DNA adduct, in mitochondrial DNA**

Orrette R. Wauchope<sup>1</sup>, Michelle M. Mitchener<sup>2</sup>, William N. Beavers<sup>2</sup>, James J. Galligan<sup>1</sup>, Jeannie M. Camarillo<sup>1</sup>, William D. Sanders<sup>1</sup>, Philip J. Kingsley<sup>1</sup>, Ha-Na Shim<sup>3,4</sup>, Thomas Blackwell<sup>3,4</sup>, Thong Luong<sup>3,4</sup>, Mark deCaestecker<sup>5</sup>, Joshua P. Fessel<sup>3,4</sup>, and Lawrence J. Marnett<sup>\*,1,2,4</sup>

A. B. Hancock, Jr., Memorial Laboratory for Cancer Research, Departments of <sup>1</sup>Biochemistry, <sup>2</sup>Chemistry, <sup>3</sup>Cancer Biology, <sup>4</sup>Pharmacology, Vanderbilt Institute of Chemical Biology, Center in Molecular Toxicology, Vanderbilt-Ingram Cancer Center, Vanderbilt University School of Medicine, <sup>5</sup>Departments of Cell and Developmental Biology, Surgery and Medicine.

**Supplemental Figures:**

**Supplemental Figure 1.** M<sub>1</sub>dG levels in mtDNA in RKO cells after lysis and DNA isolation in the presence of 10 mM TEMPO.

**Supplemental Figure 2. (A)** Representative LC-MS (SRM) chromatogram of the [<sup>13</sup>C, <sup>15</sup>N<sub>2</sub>]-M<sub>1</sub>dG internal standard co-eluting with M<sub>1</sub>dG from a sample. **(B)** Representative LC-MS (SRM) chromatogram of the [<sup>15</sup>N<sub>5</sub>]-6-oxo-M<sub>1</sub>dG internal standard. No 6-oxo-M<sub>1</sub>dG was detected in the digested mtDNA samples. **(C)** Representative CID of the M<sub>1</sub>dG peak from a representative sample from RKO cells treated with rotenone (100 nM) showing its fragmentation pattern. **(D)** Representative CID of a synthetic M<sub>1</sub>dG standard. In both cases, fragmentation of the M<sub>1</sub>dG peak at 304.1 m/z with CE set 50 eV. Fragment at 188.1 corresponds to the loss of deoxyribose.

**Supplemental Figure 3.** M<sub>1</sub>dG levels in mtDNA in RKO cells after treatment with antimycin A (10 μM), mitoTEMPO (10 μM), TEMPOL (μM) for 24 h.

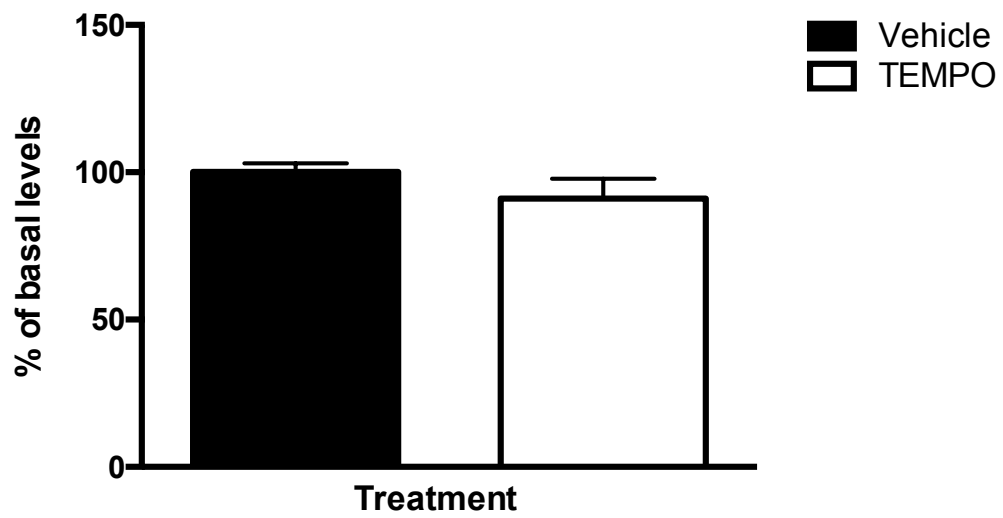

Figure S1.

**A.**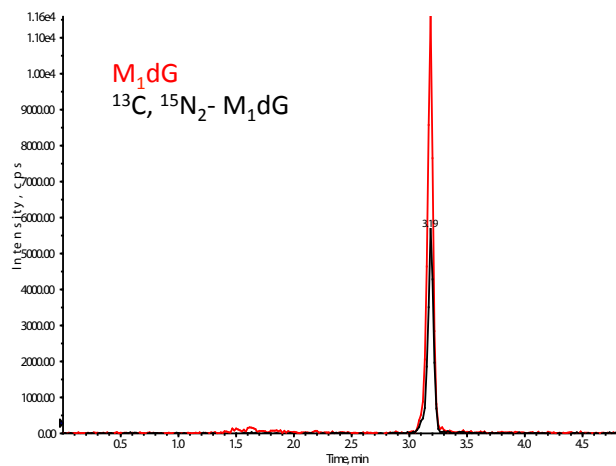**B.**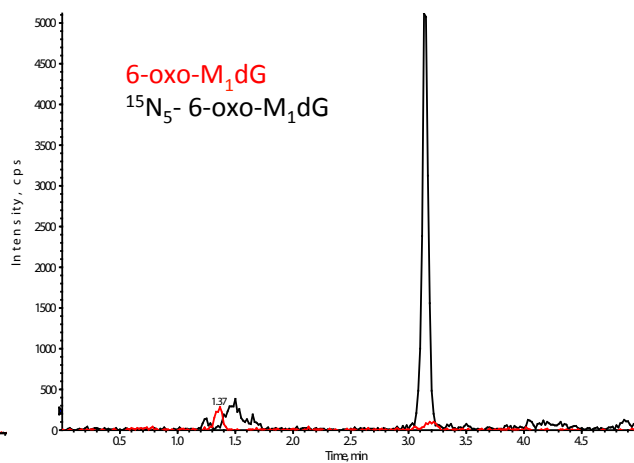**C.**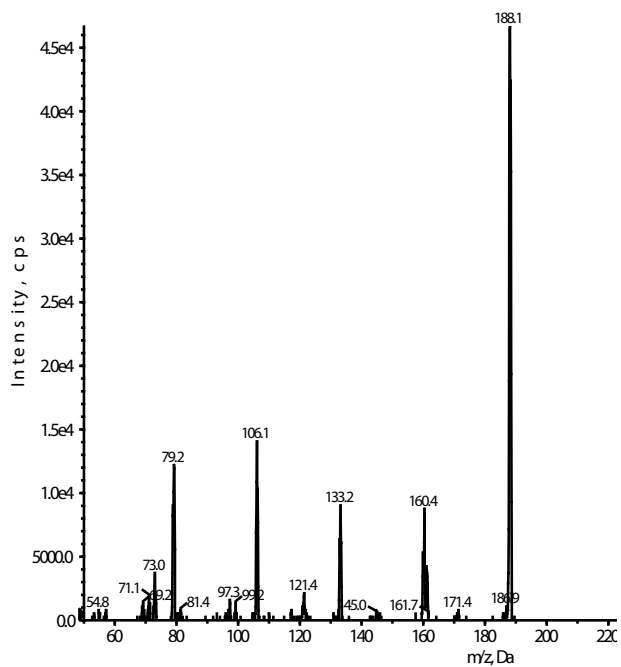**D.**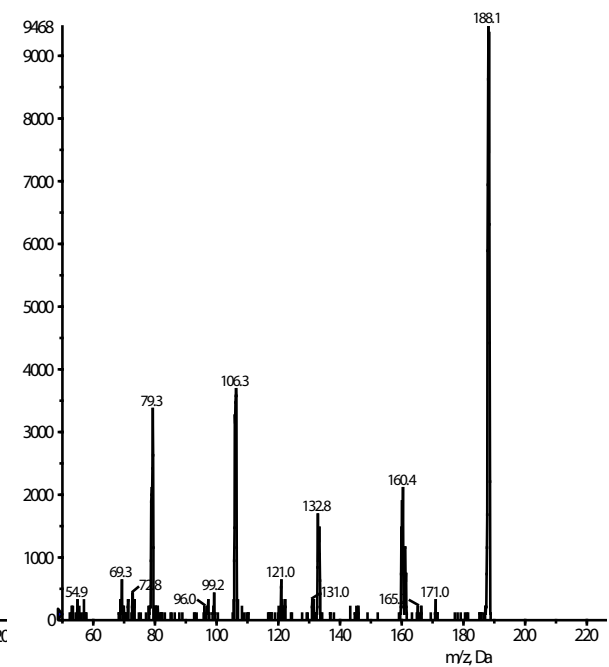**Figure S2.**

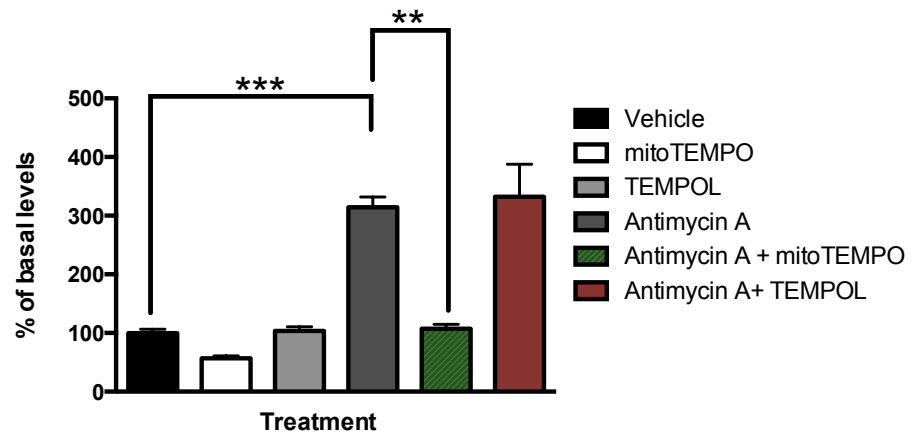

Figure S3.
